# Supplementary material
Source: PubMed Central journal article supplement (PMC4312243)

**a**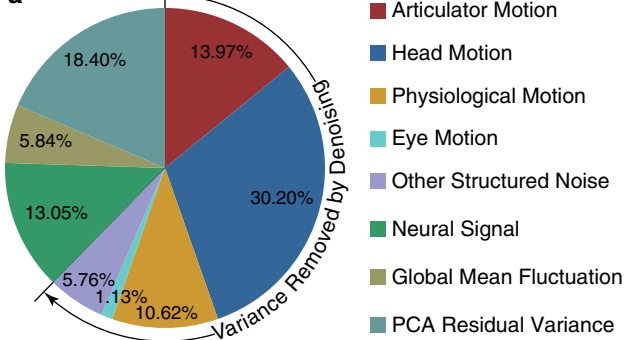**b**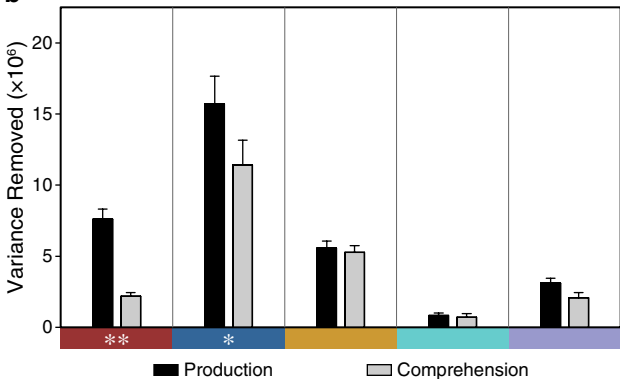

Supplement: NIHMS630351-supplement-1.pdf [file NIHMS630351-supplement-1.pdf]

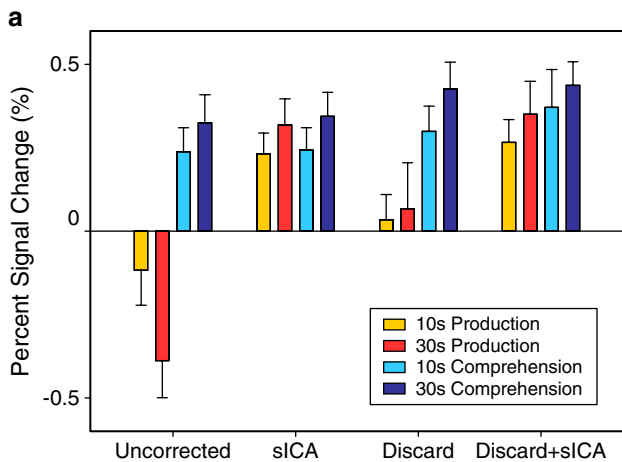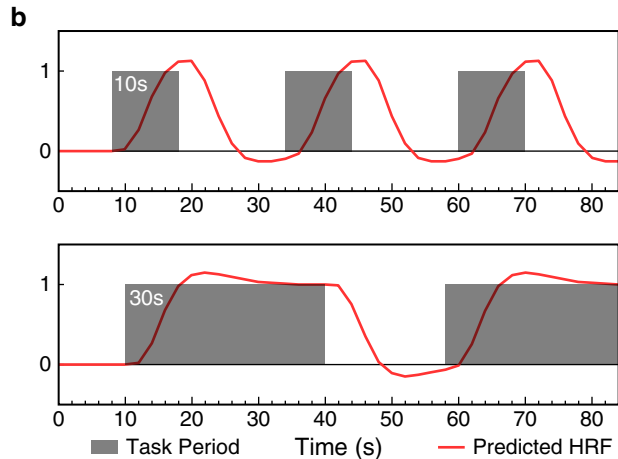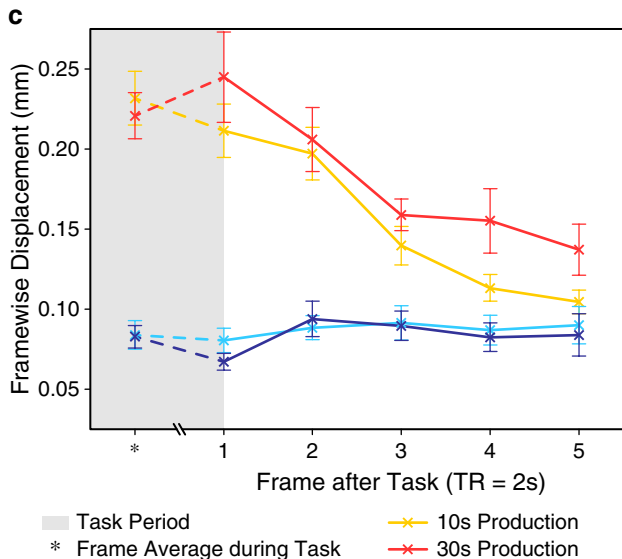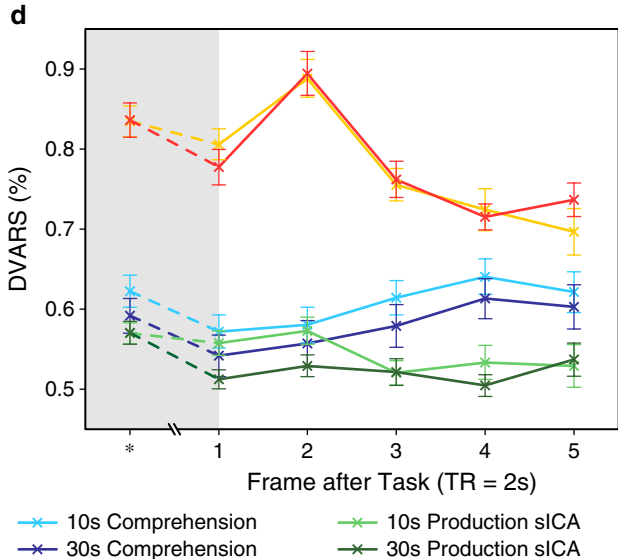

Supplement: NIHMS630351-supplement-2.pdf [file NIHMS630351-supplement-2.pdf]
